# Supplementary material for: MScanner: a classifier for retrieving Medline citations
Source: Springer Nature journal article supplement (doi:10.1186/1471-2105-9-108), 2008-02-19

### 11-point interpolated precision curves

| Recall                 | 0.0  | 0.1  | 0.2  | 0.3  | 0.4  | 0.5  | 0.6  | 0.7  | 0.8  | 0.9  | 1.0  |
|------------------------|------|------|------|------|------|------|------|------|------|------|------|
| <b>AIDSBio</b>         | 1.00 | 0.98 | 0.97 | 0.96 | 0.95 | 0.94 | 0.94 | 0.93 | 0.91 | 0.87 | 0.10 |
| <b>Radiology</b>       | 1.00 | 1.00 | 1.00 | 0.93 | 0.93 | 0.71 | 0.68 | 0.65 | 0.64 | 0.24 | 0.00 |
| <b>PG07</b>            | 1.00 | 0.97 | 0.93 | 0.88 | 0.85 | 0.79 | 0.70 | 0.62 | 0.46 | 0.26 | 0.02 |
| <b>Control</b>         | 0.09 | 0.09 | 0.09 | 0.09 | 0.09 | 0.09 | 0.09 | 0.09 | 0.09 | 0.09 | 0.09 |
| <b>IEDB validation</b> | 0.75 | 0.72 | 0.72 | 0.70 | 0.67 | 0.64 | 0.58 | 0.52 | 0.42 | 0.35 | 0.27 |
| <b>IEDB query</b>      | 1.00 | 0.44 | 0.36 | 0.28 | 0.23 | 0.21 | 0.16 | 0.12 | 0.08 | 0.04 | -    |

11-point interpolated precision curves

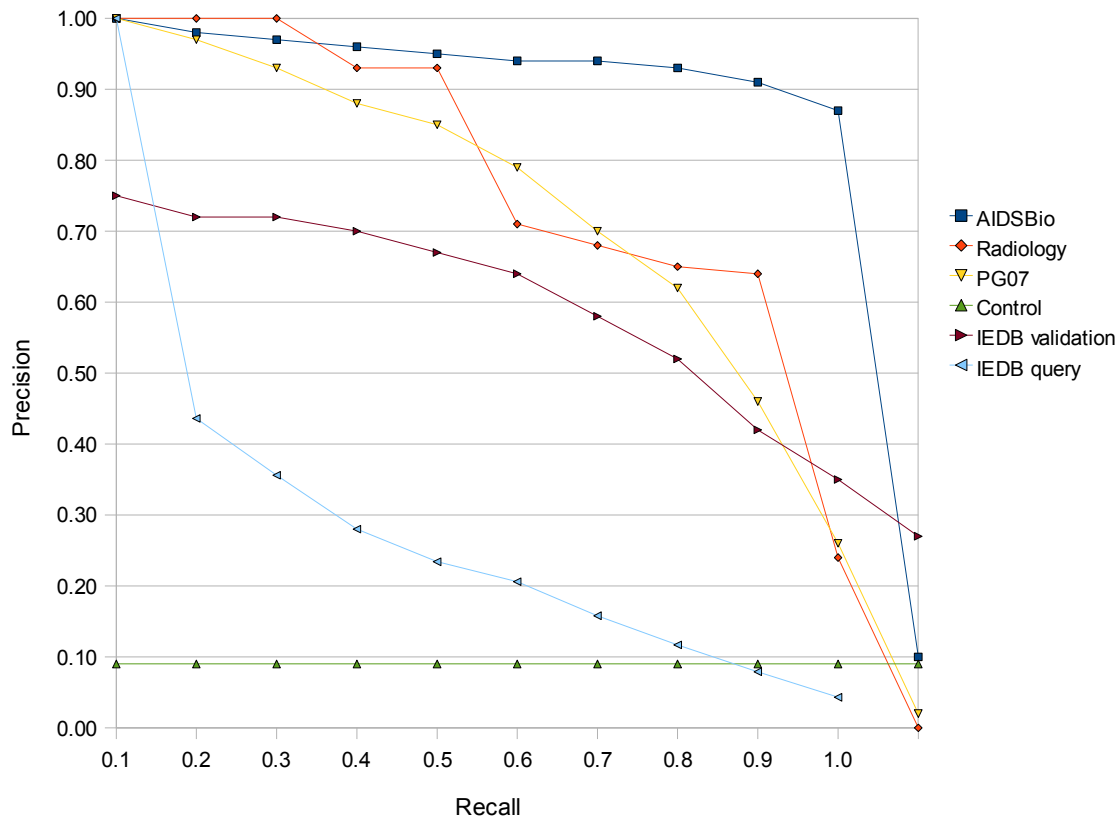

Supplement: 12859_2007_2093_MOESM1_ESM.pdf [file 12859_2007_2093_MOESM1_ESM.pdf]
