# Supplementary figures and images for: MScanner: a classifier for retrieving Medline citations
Source: Springer Nature journal article supplement (doi:10.1186/1471-2105-9-108), 2008-02-19

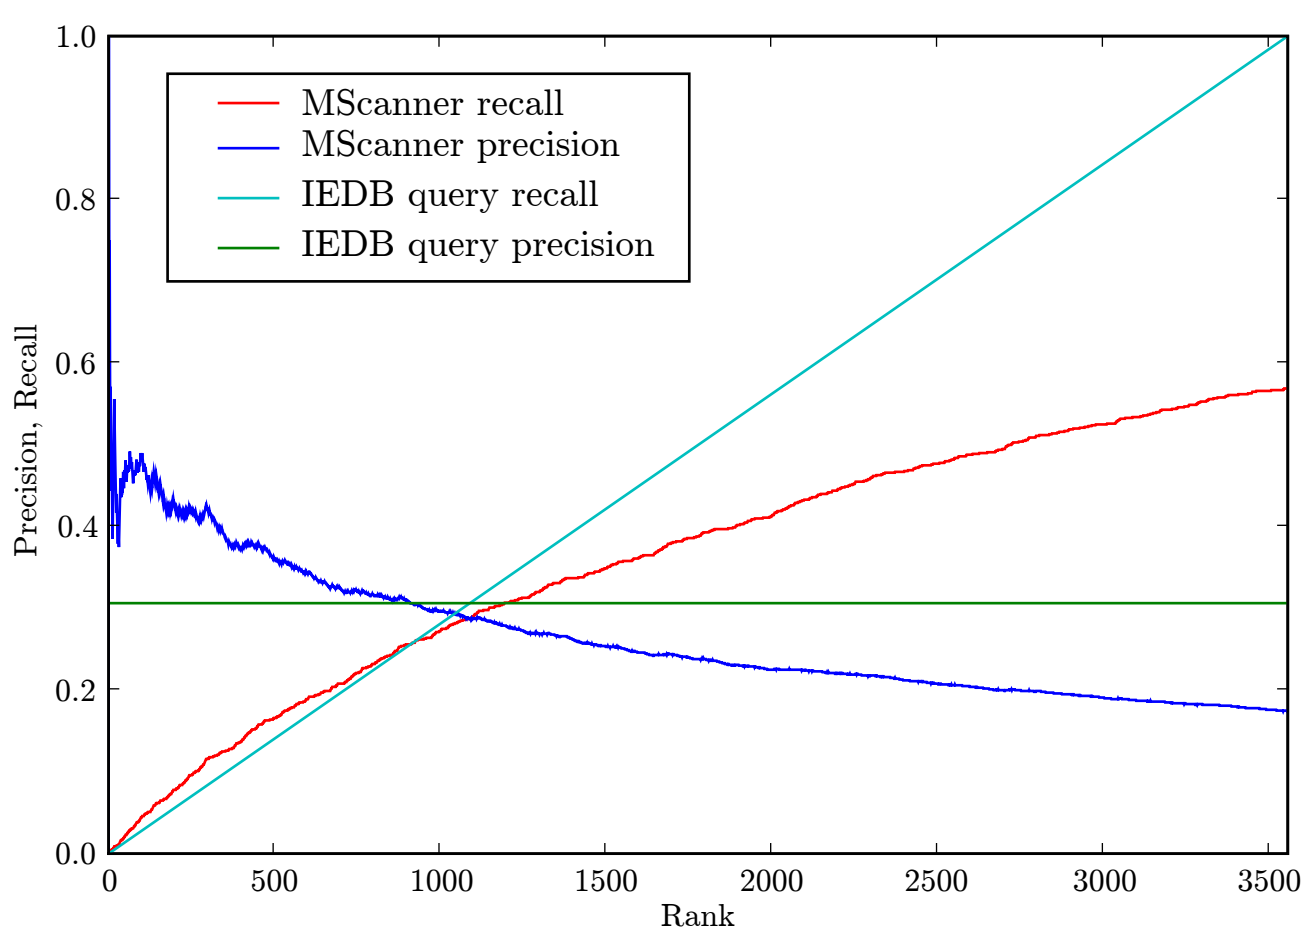

Supplement: 12859_2007_2093_MOESM10_ESM.pdf [file 12859_2007_2093_MOESM10_ESM.pdf]

AIDSBio

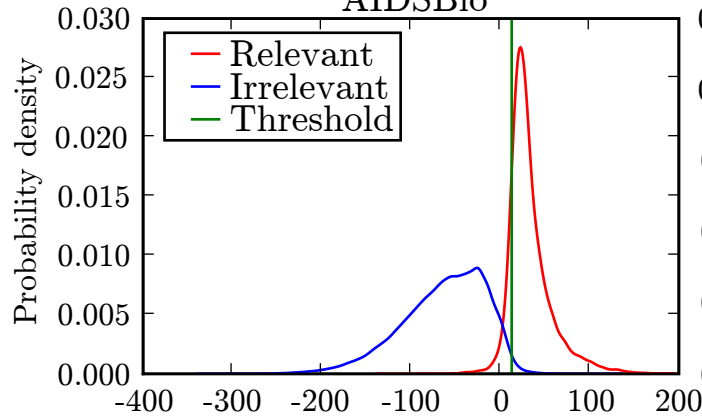

Radiology

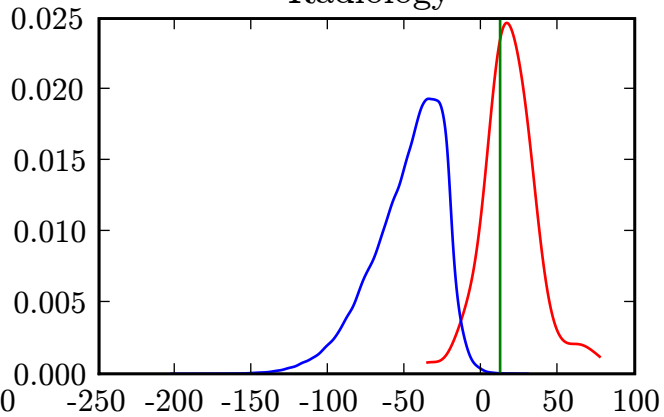

PG07

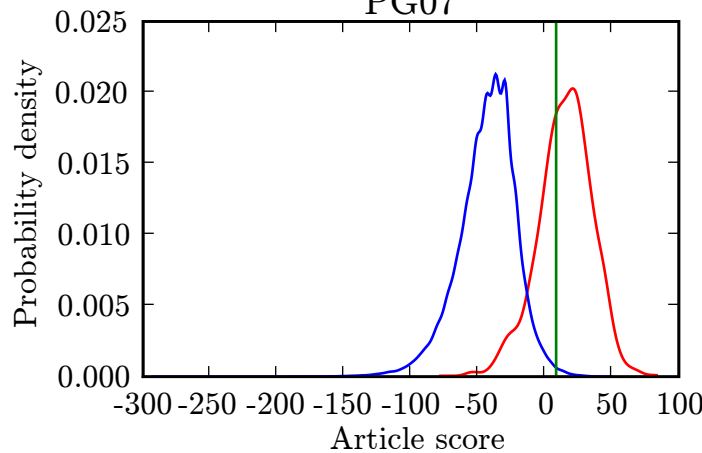

Control

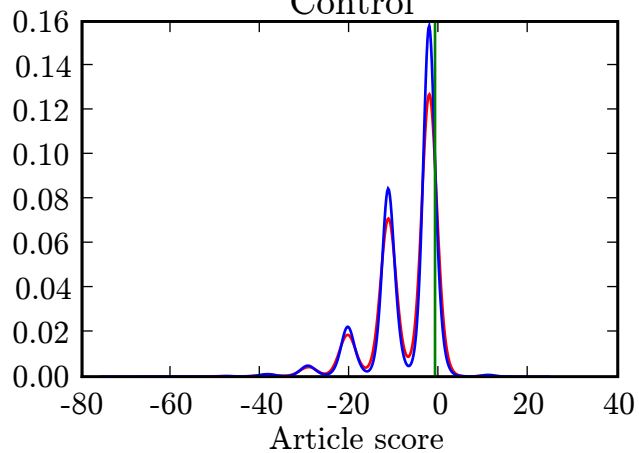

Supplement: 12859_2007_2093_MOESM7_ESM.pdf [file 12859_2007_2093_MOESM7_ESM.pdf]

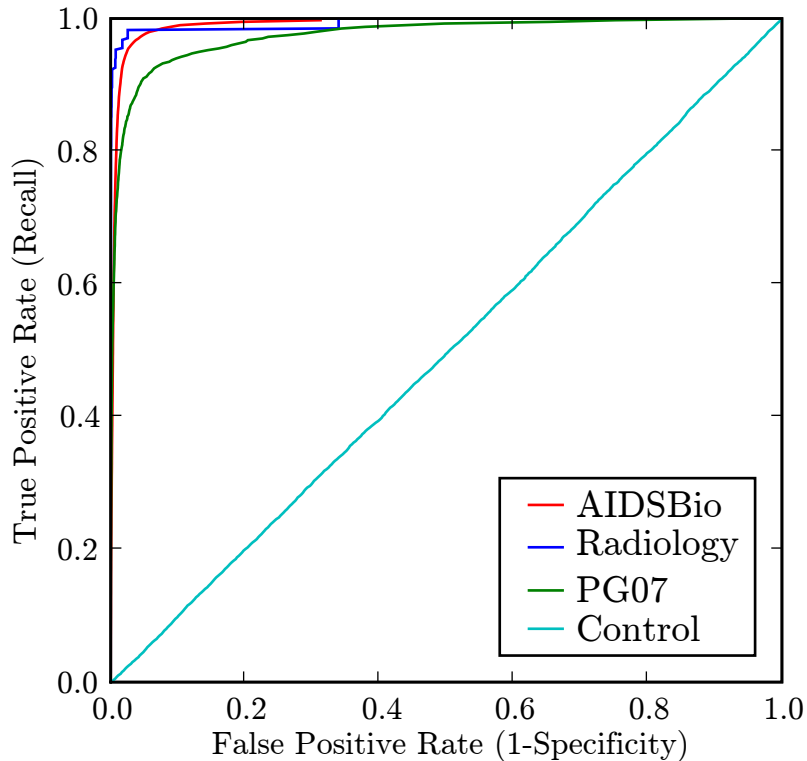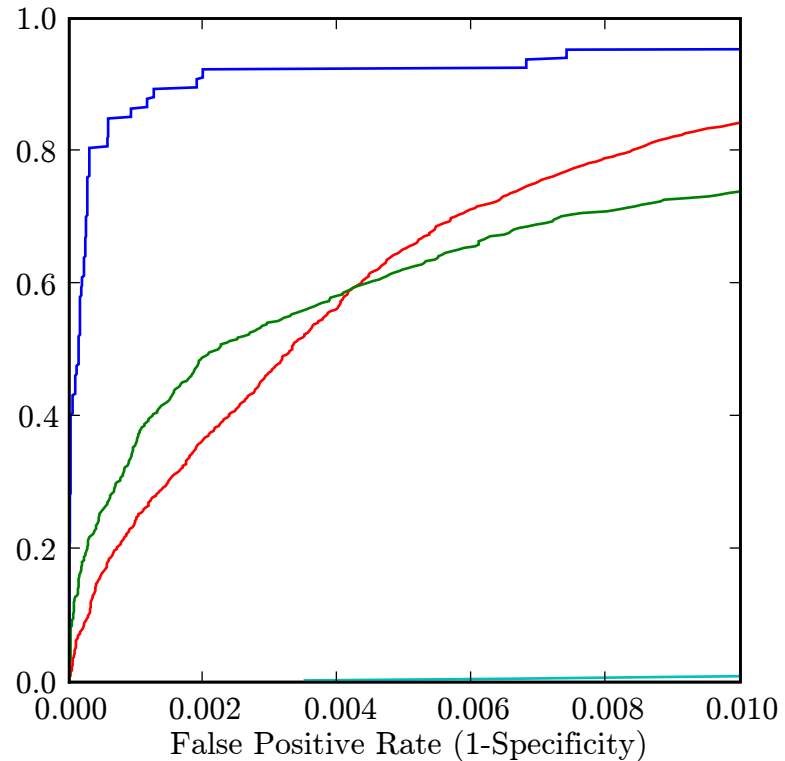

Supplement: 12859_2007_2093_MOESM8_ESM.pdf [file 12859_2007_2093_MOESM8_ESM.pdf]

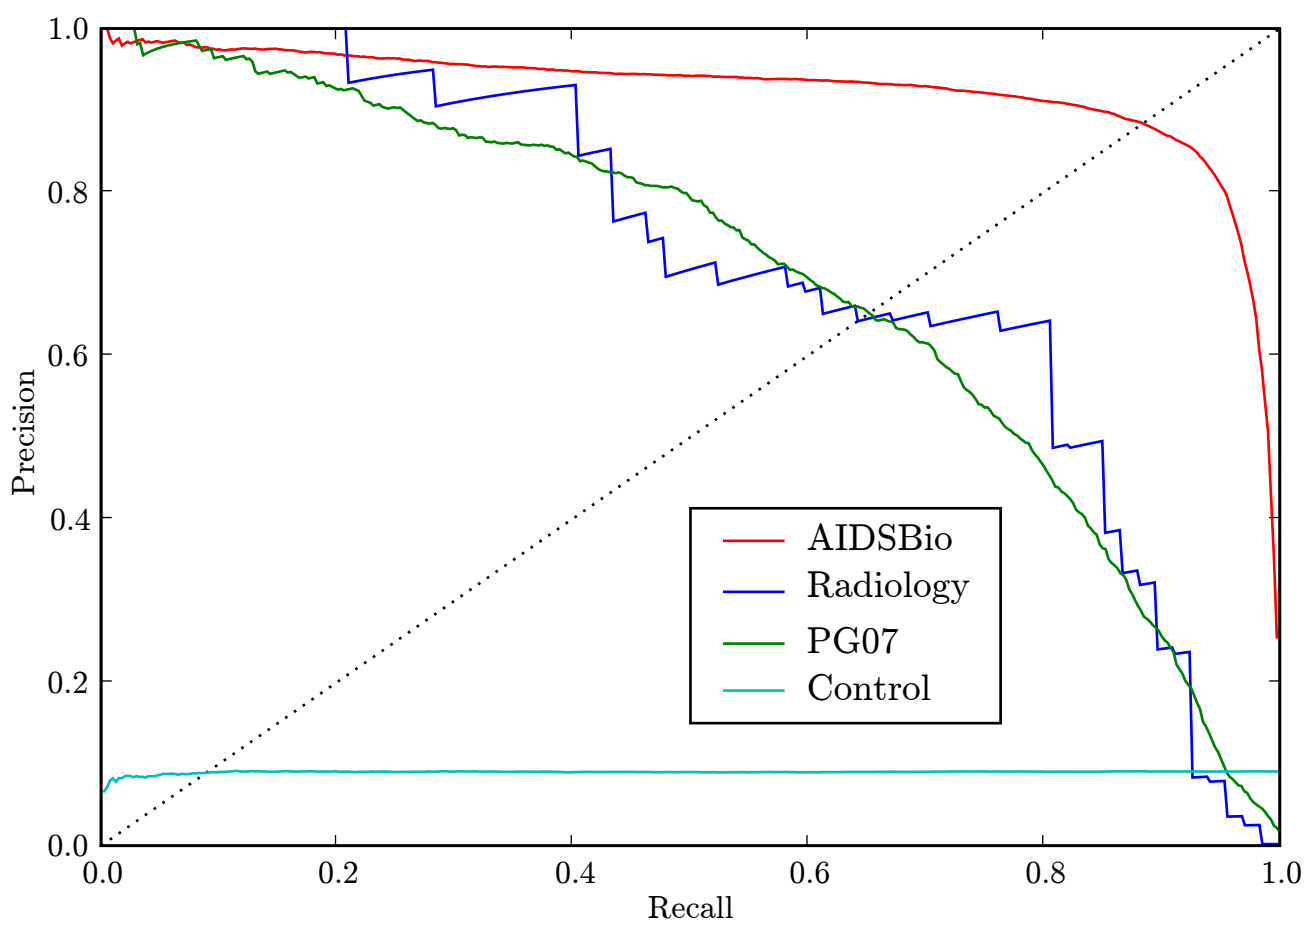

Supplement: 12859_2007_2093_MOESM9_ESM.pdf [file 12859_2007_2093_MOESM9_ESM.pdf]
